# Supplementary material
Source: MDPI journal article supplement (https://www.mdpi.com/2227-9717/9/11/2037)
Supplement: s1 [file s1]

Supplementary Materials

# Bioreactor Rhamnolipid Production Using Palm Oil Agricultural Refinery By-Products

Mohd Nazren Radzuan <sup>1,2,3,\*</sup>, James Winterburn <sup>4</sup> and Ibrahim Banat <sup>5</sup>

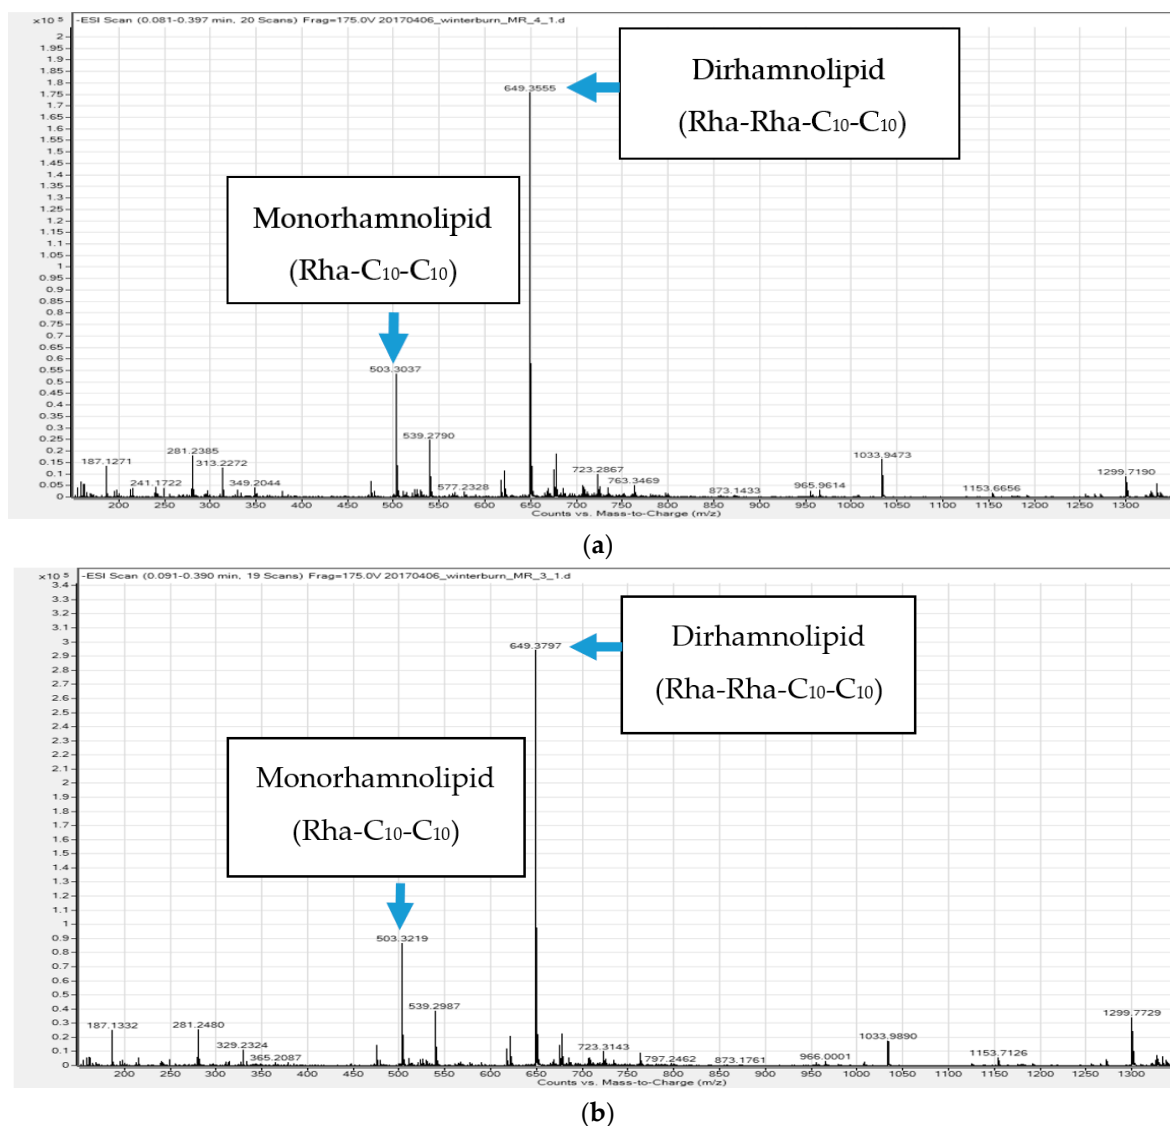

**Figure S1.** Biosurfactant Identification using GC-MS. (a) PFAD and (b) FAME.

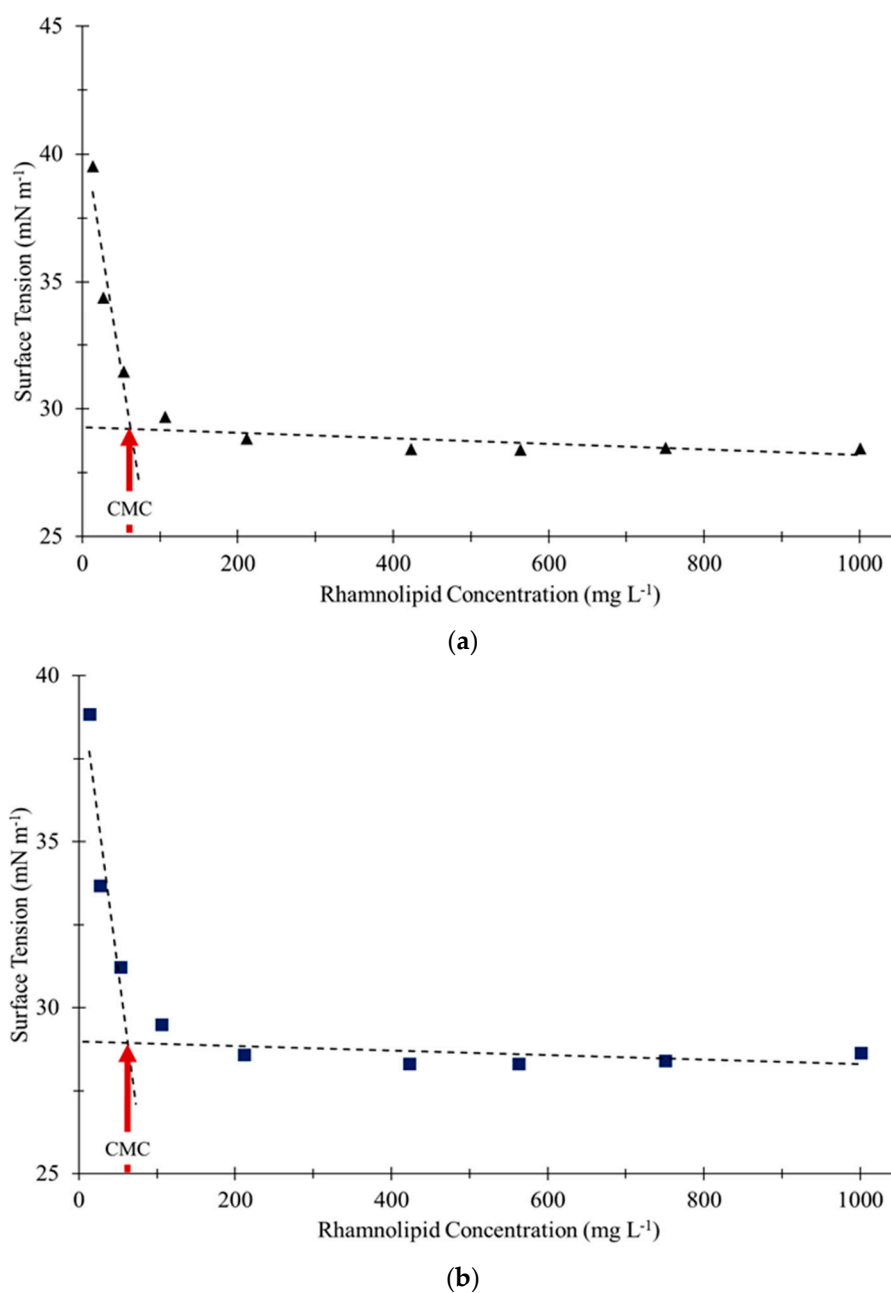

**Figure S2.** Rhamnolipid critical micelle concentration from (a) PFAD and (b) FAME.

**Table S1.** Critical micelle concentration determination using the intersection of two lines.

| Substrate | Linear Equation (1)         | Linear Equation (2)         | CMC (mg L <sup>-1</sup> ) |
|-----------|-----------------------------|-----------------------------|---------------------------|
| PFAD      | $ST = -0.0011(RI) + 29.285$ | $ST = -0.1908 + 41.027$     | 62                        |
| FAME      | $ST = -0.0007(RI) + 28.987$ | $ST = -0.1784(RI) + 40.077$ | 62                        |

\*Surface Tension (ST) and Rhamnolipid Concentration (RI).
